# Supplementary material for: What explains the inequalities in health care utilization between immigrants and non-migrants in Switzerland?
Source: PubMed Central journal article supplement (PMC7977586; doi:10.1186/s12889-021-10393-9), 2021-03-18
Supplement: 12889_2021_10393_MOESM1_ESM.pdf [file 12889_2021_10393_MOESM1_ESM.pdf]

## Additional Files

### Additional Tables

**Table S.1 Description of all variables**

| Variable                                     | Description                                                                                                                                                                                                                                                                                                                                                     |
|----------------------------------------------|-----------------------------------------------------------------------------------------------------------------------------------------------------------------------------------------------------------------------------------------------------------------------------------------------------------------------------------------------------------------|
| <b>Predictors of health care utilization</b> |                                                                                                                                                                                                                                                                                                                                                                 |
| age                                          | Age is restricted between 17 and 73 years old and five age categories were created.                                                                                                                                                                                                                                                                             |
| male                                         | Binary indicator of gender equaling one if individual is male and zero if individual is female.                                                                                                                                                                                                                                                                 |
| married                                      | Binary indicator of civil status equaling one if individual is married and zero if individual is not married.                                                                                                                                                                                                                                                   |
| German-speaking region                       | Binary indicator of language region equaling one if region is German-speaking and zero if region is French- or Italian-speaking.                                                                                                                                                                                                                                |
| urban                                        | Binary indicator of urban region equaling one if region is urban and zero if region is rural.                                                                                                                                                                                                                                                                   |
| education                                    | Categorical variable including compulsory, secondary and tertiary education.                                                                                                                                                                                                                                                                                    |
| household income                             | Equalized monthly household income.                                                                                                                                                                                                                                                                                                                             |
| occupation                                   | Categorical variable including the following occupation groups: intern, ordinary employee, employee with leadership, director or chief, self-employed, inactive and unemployed.                                                                                                                                                                                 |
| deductible                                   | Level of deductible as defined in Switzerland: = 300, = 500, = 1000, = 1500, = 2000, = 2500 and missing, when no answer was provided. The last group was included in order to keep individuals in the sample that do not know the level of their deductible. Such individuals could, for example, be young adults who are insured together with their parents.  |
| ADL                                          | Binary indicator of self-assessed chronic illness that equals one if activities of daily living have strongly or somewhat been impaired due to health problems during the past six months, and zero if they have not been impaired at all.                                                                                                                      |
| <b>Health care utilization measures</b>      |                                                                                                                                                                                                                                                                                                                                                                 |
| extensive margin of doctor visits            | Binary indicator showing the probability of visiting the doctor based on whether the individual self-reported as having visited a doctor in the past twelve months. This includes all types of doctor visits (e.g. to general practitioners, specialists and gynecologists) but not to dentists. Home visits are also included but not telephone consultations. |
| extensive margin of ED visits                | Binary indicator showing the probability of visiting the emergency department based on whether the individual self-reported as having visited the emergency department in the past twelve months. This only refers to unplanned visits.                                                                                                                         |
| intensive margin of doctor visits            | Count indicator of the self-reported number of doctor visits, if the individual had at least one visit during the past twelve months.                                                                                                                                                                                                                           |
| intensive margin of ED visits                | Count indicator of the self-reported number of emergency department visits, if the individual had at least one visit during the past twelve months.                                                                                                                                                                                                             |

Table S.2 Decomposition results at intensive margin of doctor and ED visits

|                                                            |        | Explained           |                        |                          |                      | Total  | Unexplained Total | Number of observations |
|------------------------------------------------------------|--------|---------------------|------------------------|--------------------------|----------------------|--------|-------------------|------------------------|
|                                                            |        | Demographic factors | Socio-economic factors | Health insurance factors | Health status factor |        |                   |                        |
| <b>Inequality at the intensive margin of doctor visits</b> |        |                     |                        |                          |                      |        |                   |                        |
| Swiss - First-generation immigrants                        | = ns   | 0.000               | -0.073                 | -0.004                   | -0.016               | -0.093 | -0.010            | 14782                  |
| Swiss - Second-generation immigrants                       | = ns   | 1.848               | 0.467                  | 0.058                    | 0.499                | 2.872  | -2.902            | 11872                  |
| Swiss - Culturally different immigrants                    | = ns   | 0.152               | -0.220                 | -0.133                   | -0.122               | -0.323 | 0.152             | 13239                  |
| Swiss - Culturally similar immigrants                      | = ns   | -0.039              | 0.055                  | 0.067                    | 0.109                | 0.192  | -0.251            | 13415                  |
| <b>Inequality at the intensive margin of ED visits</b>     |        |                     |                        |                          |                      |        |                   |                        |
| Swiss - First-generation immigrants                        | = -0.1 | -0.035              | -0.027                 | 0.001                    | 0.002                | -0.059 | -0.021            | 2359                   |
| Swiss - Second-generation immigrants                       | = ns   | 0.598               | 0.243                  | -0.076                   | 0.027                | 0.791  | -0.845            | 1803                   |
| Swiss - Culturally different immigrants                    | = -0.1 | -0.072              | -0.033                 | -0.067                   | -0.002               | -0.173 | 0.059             | 2084                   |
| Swiss - Culturally similar immigrants                      | = ns   | -0.006              | -0.001                 | 0.002                    | 0.003                | -0.001 | 0.054             | 2078                   |

Source: SHS 2012, GMM II 2010, own calculations.

Notes: ns: not significant. The results are expressed in absolute coefficients.

Table S.3 Group differences in health care utilization for different immigrant groups

|                                         | Swiss | Immigrants             |                          |                        |                                    |                                 |
|-----------------------------------------|-------|------------------------|--------------------------|------------------------|------------------------------------|---------------------------------|
|                                         |       | Neighbouring countries | Other European countries | Non-European countries | Residence duration $\geq 10$ years | Residence duration $< 10$ years |
| Pr(doctor visit)                        | 0.782 | 0.790<br>(0.407)       | 0.682***<br>(0.474)      | 0.766<br>(0.439)       | 0.757<br>(0.442)                   | 0.711***<br>(0.462)             |
| Pr(ED visit)                            | 0.115 | 0.139**<br>(0.347)     | 0.136**<br>(0.347)       | 0.153<br>(0.383)       | 0.133*<br>(0.349)                  | 0.144**<br>(0.360)              |
| Number of doctor visits if doctor visit | 4.22  | 4.41<br>(5.00)         | 4.21<br>(4.83)           | 4.35<br>(5.43)         | 4.65**<br>(5.26)                   | 3.93*<br>(4.80)                 |
| Number of ED visits if ED visit         | 1.20  | 1.21<br>(0.57)         | 1.31**<br>(0.68)         | 1.31<br>(0.66)         | 1.28*<br>(0.65)                    | 1.27<br>(0.64)                  |
| Number of observations                  | 14545 | 1600                   | 2530                     | 1316                   | 2635                               | 2460                            |

Source: SHS 2012, GMM II 2010, own calculations.

Notes: Switzerland's neighbouring countries: Austria, France, Germany, Italy, Lichtenstein. Other European countries excluding Russia and Turkey and including English-speaking OECD countries: Albania, Australia, Belgium, Bulgaria, Canada, Czech Republic, Denmark, Finland, former Yugoslavia, Greece, Hungary, Ireland, Latvia, Lithuania, Luxembourg, Malta, Moldova, Netherlands, Poland, Portugal, Romania, Slovakia, Spain, Sweden, Ukraine, United Kingdom, United States. Non-European countries: Afghanistan, Algeria, Angola, Argentina, Armenia, Bolivia, Brazil, Burundi, Cambodia, Cameroon, Cape Verde, Central Africa, Chile, China, Colombia, Congo, Costa Rica, Côte d'Ivoire, Cuba, Dominican Republic, Ecuador, Egypt, Eritrea, Ethiopia, Gambia, Georgia, Guinea, Haiti, India, Indonesia, Iran, Iraq, Israel, Japan, Kenya, Lebanon, Madagascar, Mali, Mauritius, Mexico, Mongolia, Morocco, Niger, Pakistan, Palestine, Peru, Philippines, Russia, Rwanda, Senegal, Somalia, South Africa, Sri Lanka, Thailand, Togo, Tunisia, Turkey, Uzbekistan, Venezuela.

Reported numbers are mean values, and standard deviations are in parentheses. Sample size = 19991 observations. Only adult population up to 73 years old included. Health care utilization variables refer to past 12 months. Pr: Probability. ED: emergency department. The significance levels refer to the difference between the Swiss and each immigrant group: \*\*\*  $p < 0.001$ , \*\*  $p < 0.01$ , \*  $p < 0.05$ .

**Table S.4 Decomposition results at extensive margin of doctor and ED visits for different immigrant groups**

|                                                            |          | Explained           |                        |                          |                      | Total  | Unexplained Total | Number of observations |
|------------------------------------------------------------|----------|---------------------|------------------------|--------------------------|----------------------|--------|-------------------|------------------------|
|                                                            |          | Demographic factors | Socio-economic factors | Health insurance factors | Health status factor |        |                   |                        |
| <b>Inequality at the extensive margin of doctor visits</b> |          |                     |                        |                          |                      |        |                   |                        |
| Swiss - Immigrants from neighbouring countries             | = ns     | 0.012               | 0.003                  | 0.006                    | 0.003                | 0.024  | -0.032            | 16145                  |
| Swiss - Immigrants from other European countries           | = 0.100  | -0.005              | 0.032                  | 0.002                    | 0.006                | 0.035  | 0.065             | 17075                  |
| Swiss - Immigrants from non-European countries             | = ns     | 0.012               | 0.027                  | -0.009                   | -0.008               | 0.023  | -0.007            | 15861                  |
| Swiss - Immigrants with residence duration $\geq$ 10 years | = ns     | 0.003               | 0.017                  | -0.005                   | -0.006               | 0.008  | 0.017             | 17180                  |
| Swiss - Immigrants with residence duration < 10 years      | = 0.071  | 0.003               | 0.013                  | 0.014                    | 0.011                | 0.041  | 0.030             | 17005                  |
| <b>Inequality at the extensive margin of ED visits</b>     |          |                     |                        |                          |                      |        |                   |                        |
| Swiss - Immigrants from neighbouring countries             | = -0.024 | -0.004              | 0.015                  | -0.001                   | 0.002                | 0.012  | -0.036            | 16145                  |
| Swiss - Immigrants from other European countries           | = -0.021 | -0.035              | 0.003                  | 0.001                    | 0.003                | -0.028 | 0.007             | 17075                  |
| Swiss - Immigrants from non-European countries             | = ns     | -0.017              | -0.021                 | -0.010                   | -0.003               | -0.051 | 0.014             | 15861                  |
| Swiss - Immigrants with residence duration $\geq$ 10 years | = -0.018 | 0.001               | 0.000                  | -0.002                   | -0.001               | -0.003 | -0.015            | 17180                  |
| Swiss - Immigrants with residence duration < 10 years      | = -0.029 | -0.033              | -0.002                 | 0.001                    | 0.002                | -0.031 | 0.003             | 17005                  |

Source: SHS 2012, GMM II 2010, own calculations.

Notes: ns: not significant. The results are expressed in absolute coefficients. The observed difference shown in column two is the sum of columns seven and eight.

**Table S.5 Decomposition results at intensive margin of doctor and ED visits for different immigrant groups**

|                                                            |        | Explained           |                        |                          |                      | Total  | Unexplained Total | Number of observations |
|------------------------------------------------------------|--------|---------------------|------------------------|--------------------------|----------------------|--------|-------------------|------------------------|
|                                                            |        | Demographic factors | Socio-economic factors | Health insurance factors | Health status factor |        |                   |                        |
| <b>Inequality at the intensive margin of doctor visits</b> |        |                     |                        |                          |                      |        |                   |                        |
| Swiss - Immigrants from neighbouring countries             | = ns   | 0.030               | 0.010                  | 0.074                    | 0.074                | 0.188  | -0.369            | 12637                  |
| Swiss - Immigrants from other European countries           | = ns   | -0.054              | 0.033                  | -0.006                   | 0.017                | -0.010 | 0.020             | 13043                  |
| Swiss - Immigrants from non-European countries             | = ns   | 0.443               | -0.295                 | -0.170                   | -0.139               | -0.161 | 0.023             | 12346                  |
| Swiss - Immigrants with residence duration $\geq$ 10 years | = -0.4 | -0.017              | -0.086                 | -0.134                   | -0.158               | -0.395 | -0.011            | 13305                  |
| Swiss - Immigrants with residence duration < 10 years      | = 0.3  | 0.107               | -0.087                 | 0.099                    | 0.150                | 0.270  | 0.011             | 13070                  |
| <b>Inequality at the intensive margin of ED visits</b>     |        |                     |                        |                          |                      |        |                   |                        |
| Swiss - Immigrants from neighbouring countries             | = ns   | -0.003              | -0.004                 | 0.013                    | 0.002                | 0.008  | -0.020            | 1899                   |
| Swiss - Immigrants from other European countries           | = -0.1 | -0.138              | 0.016                  | -0.018                   | -0.001               | -0.140 | 0.022             | 2028                   |
| Swiss - Immigrants from non-European countries             | = ns   | -0.065              | 0.021                  | -0.124                   | 0.001                | -0.168 | 0.053             | 1910                   |
| Swiss - Immigrants with residence duration $\geq$ 10 years | = -0.1 | -0.012              | -0.061                 | 0.010                    | -0.005               | -0.068 | -0.020            | 2050                   |
| Swiss - Immigrants with residence duration < 10 years      | = ns   | -0.096              | -0.016                 | 0.007                    | 0.010                | -0.094 | 0.022             | 2050                   |

Source: SHS 2012, GMM II 2010, own calculations.

Notes: ns: not significant. The results are expressed in absolute coefficients. The observed difference shown in column two is the sum of columns seven and eight.

Additional Figures

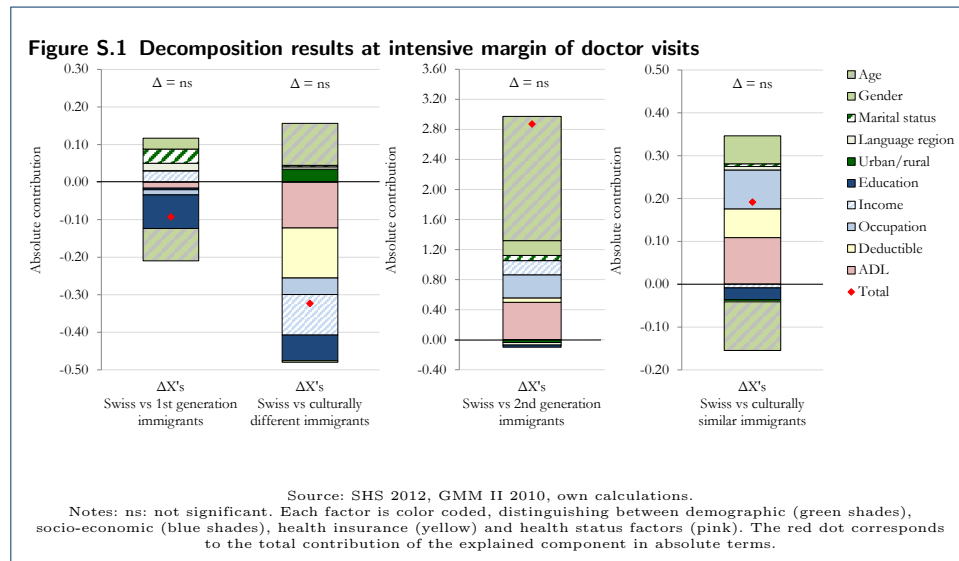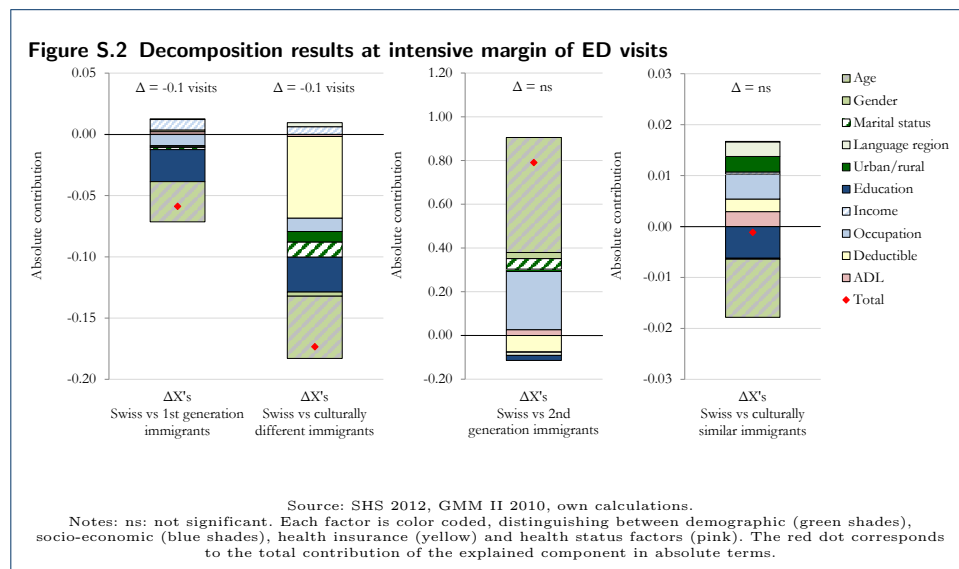

**Figure S.3 Decomposition results at extensive margin of doctor visits for different immigrant groups**

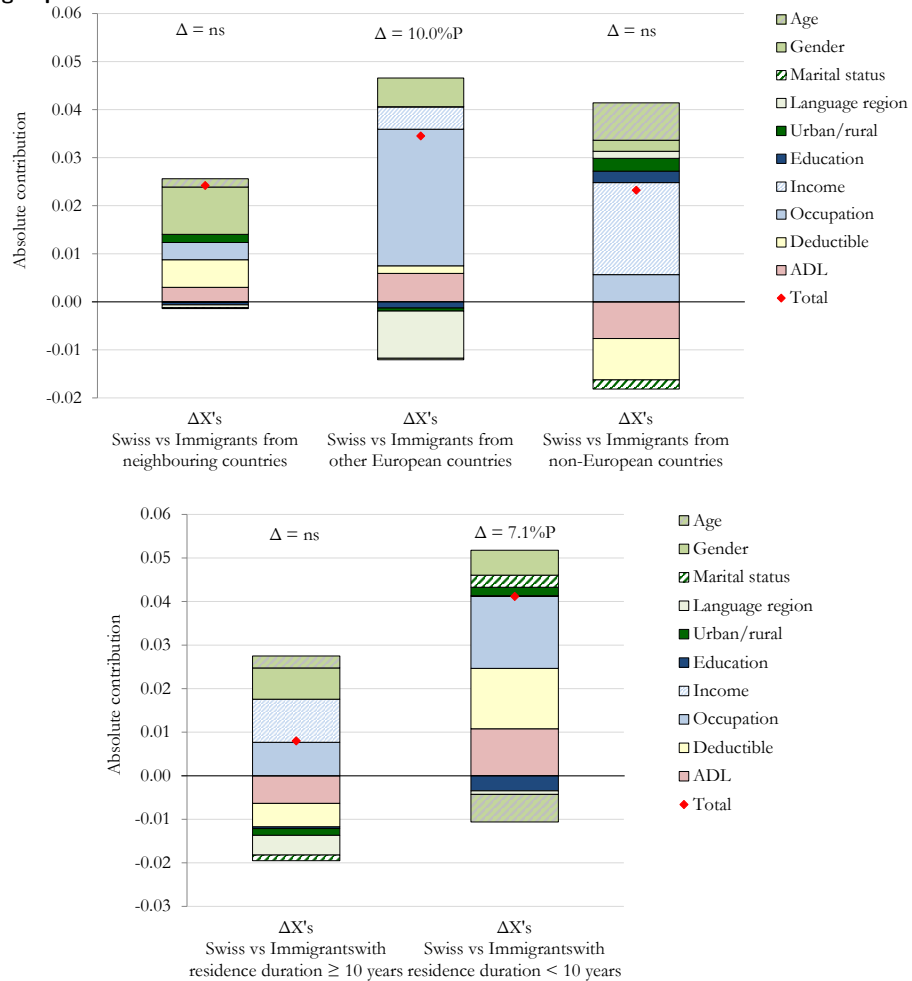

Source: SHS 2012, GMM II 2010, own calculations.

Notes: ns: not significant. Each factor is color coded, distinguishing between demographic (green shades), socio-economic (blue shades), health insurance (yellow) and health status factors (pink). The red dot corresponds to the total contribution of the explained component in absolute terms.

**Figure S.4 Decomposition results at extensive margin of ED visits for different immigrant groups**

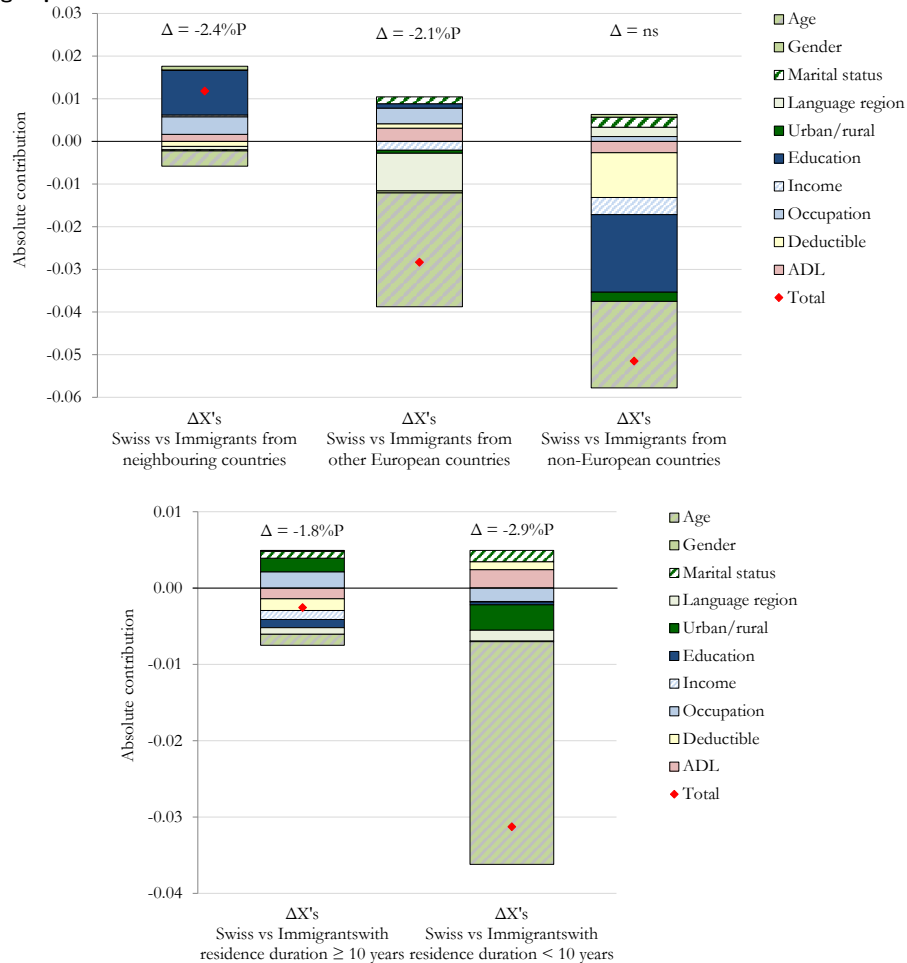

Source: SHS 2012, GMM II 2010, own calculations.  
 Notes: ns: not significant. Each factor is color coded, distinguishing between demographic (green shades), socio-economic (blue shades), health insurance (yellow) and health status factors (pink). The red dot corresponds to the total contribution of the explained component in absolute terms.

**Figure S.5 Decomposition results at intensive margin of doctor visits for different immigrant groups**

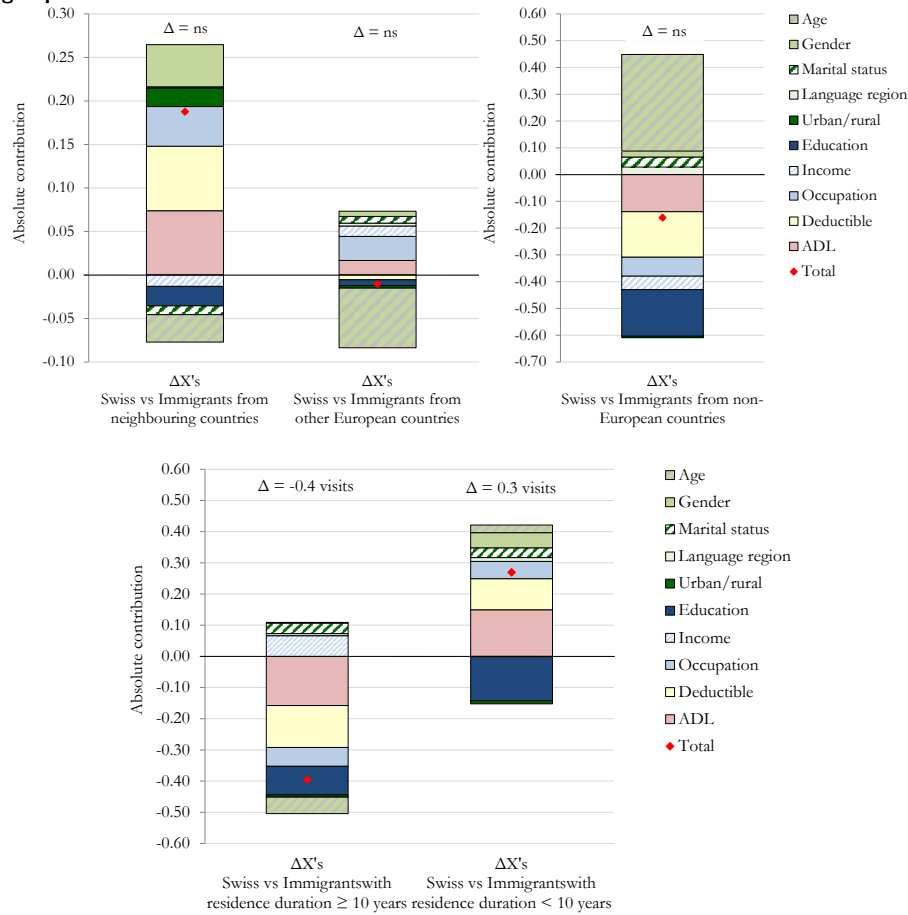

Source: SHS 2012, GMM II 2010, own calculations.

Notes: ns: not significant. Each factor is color coded, distinguishing between demographic (green shades), socio-economic (blue shades), health insurance (yellow) and health status factors (pink). The red dot corresponds to the total contribution of the explained component in absolute terms.

**Figure S.6 Decomposition results at intensive margin of ED visits for different immigrant groups**

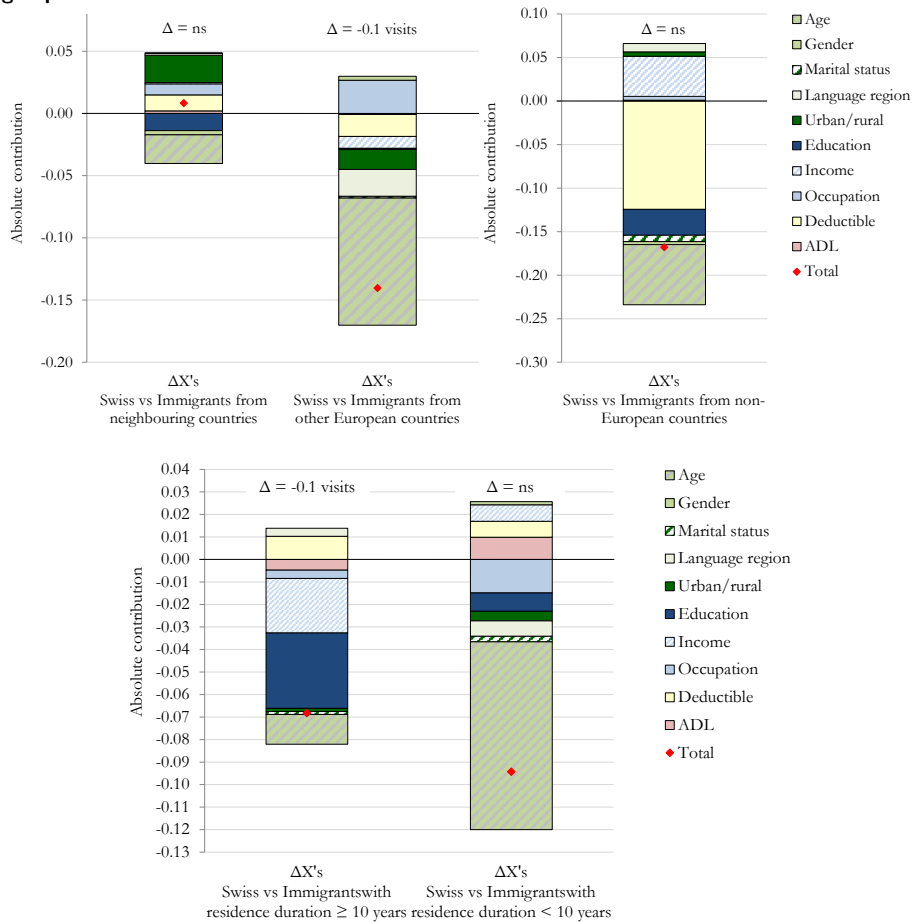

Source: SHS 2012, GMM II 2010, own calculations.  
 Notes: ns: not significant. Each factor is color coded, distinguishing between demographic (green shades), socio-economic (blue shades), health insurance (yellow) and health status factors (pink). The red dot corresponds to the total contribution of the explained component in absolute terms.
